# Supplementary material for: Lipid-lowering and antioxidative effects ofApium graveolensL. root flavonoid extracts
Source: Royal Society of Chemistry journal article supplement (doi:10.1039/c9ra04481g), 2019-01-01
Supplement: c9ra04481g1.pdf [file c9ra04481g1.pdf]

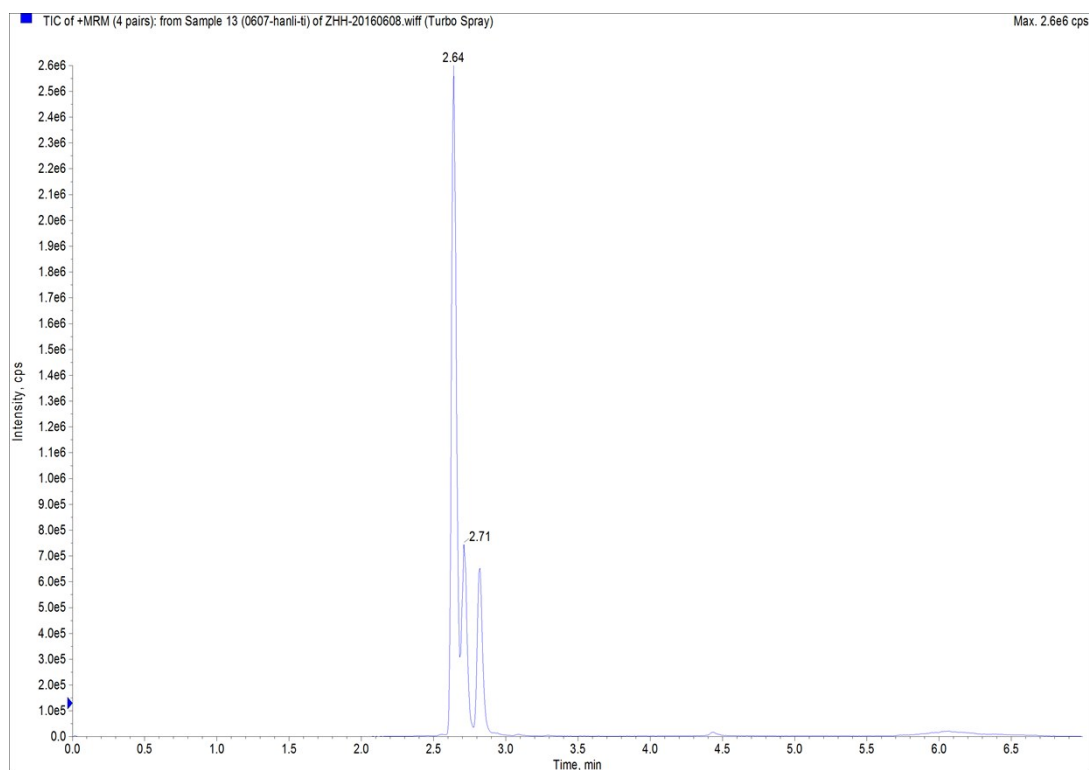

| Chemical                                  | Ion pair    | $t_R$ (min) | Intensity (cps) |
|-------------------------------------------|-------------|-------------|-----------------|
| Apiin                                     | 565.2/271.1 | 2.64        | 2.4e6           |
| 3'-methoxyapiin                           | 595.2/301.0 | 2.71        | 5.0e5           |
| Apigenin-7-O- $\beta$ -D-glucoopyranoside | 433.2/271.0 | 2.82        | 6.3e5           |
